# Supplementary material for: Tuning the electronic structure of PtRu bimetallic nanoparticles for promoting the hydrogen oxidation reaction in alkaline media
Source: Royal Society of Chemistry journal article supplement (doi:10.1039/c9qi00942f), 2019-01-01
Supplement: c9qi00942f1.pdf [file c9qi00942f1.pdf]

# Supporting information for

## Tuning the electronic structure of PtRu bimetallic nanoparticles for promoting hydrogen oxidation reaction in alkaline media

Chang Long<sup>a,b,c,†</sup>, Kun Wang<sup>c,†</sup>, Yanan Shi<sup>c</sup>, Zhongjie Yang<sup>c</sup>, Xiaofei Zhang<sup>a,b,c</sup>, Yin Zhang<sup>c</sup>, Jianyu Han<sup>c</sup>, Yini Bao<sup>d</sup>, Lin Chang<sup>c</sup>, Shaoqin Liu<sup>a,b\*</sup>, and Zhiyong Tang<sup>c\*</sup>

<sup>a</sup> School of Materials Science and Engineering, Harbin Institute of Technology, Harbin 150080, P. R. China.

<sup>b</sup> MOE Key Laboratory of Micro-systems and Micro-structures Manufacturing, Harbin Institute of Technology, Harbin 150080, P. R. China.

<sup>c</sup> CAS Key Laboratory of Nanosystem and Hierarchical Fabrication CAS Center for Excellence in Nanoscience, National Center for Nanoscience and Technology, Beijing 100190, P. R. China.

<sup>d</sup> West China Hospital of Stomatology, Sichuan University, Chengdu 610041, PR China

### Corresponding address:

[zytang@nanoctr.cn](mailto:zytang@nanoctr.cn)

[shaoqinliu@hit.edu.cn](mailto:shaoqinliu@hit.edu.cn)

## Supplementary Content

**Figure S1.** Polarization curves in Ar-saturated 0.1 M KOH.

**Figure S2.** Electrochemical behavior of Pt-H<sub>ad</sub> interaction.

**Figure S3.** Electrochemical surface area measurements.

**Figure S4.** Tafel plots of PtRu bimetallic nanoparticles and Pt/C

**Figure S5.** Micro-kinetic polarization plots.

**Figure S6.** Polarization curves and Koutecky–Levich plots.

**Figure S7.** ECSA-normalized kinetic current densities.

**Figure S8.** HOR activity comparison.

**Table S1.** Summary of ICP-MS results for PtRu bimetallic nanoparticles.

**Table S2.** Summary of binding energies for Pt 4f<sub>7/2</sub> and Pt 4f<sub>5/2</sub> of PtRu bimetallic nanoparticles and Pt/C from XPS results

**Table S3.** Summary of electrochemical surface areas for PtRu bimetallic nanoparticles and Pt/C.

**Table S4.** Normalized exchange current densities for PtRu bimetallic nanoparticles and Pt/C.

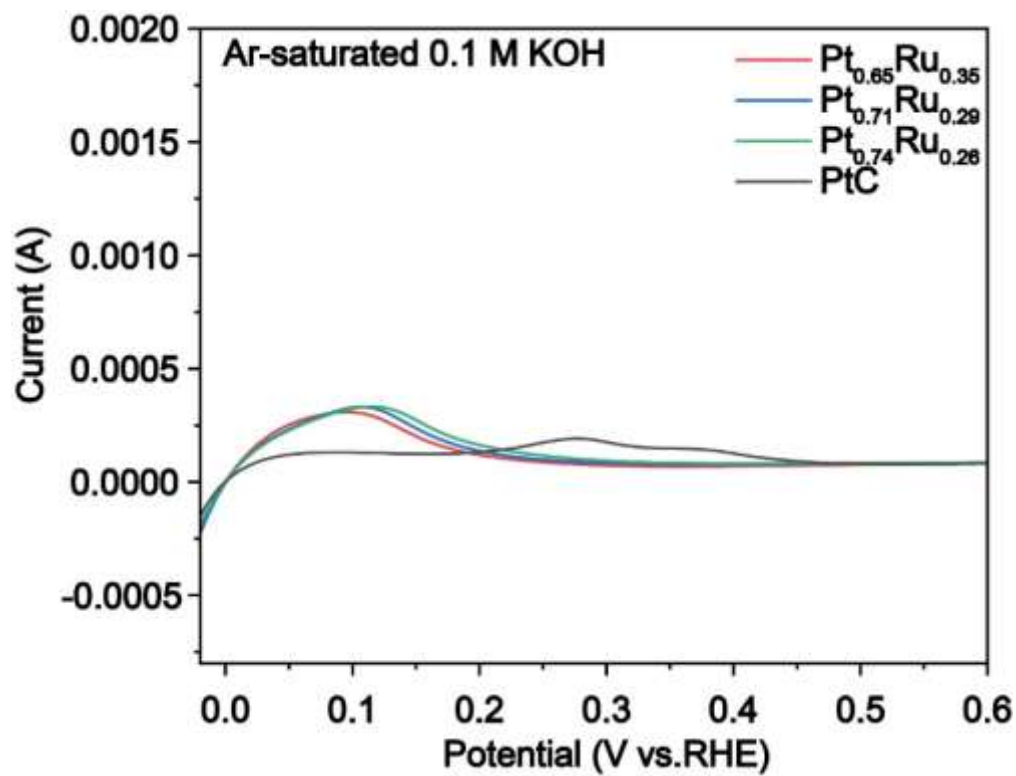

**Figure S1.** Polarization curves of PtRu bimetallic nanoparticles, and Pt/C in Ar-saturated 0.1 M KOH at a scan rate of 5 mV s<sup>-1</sup> under rotating speed of 1600 r.p.m.

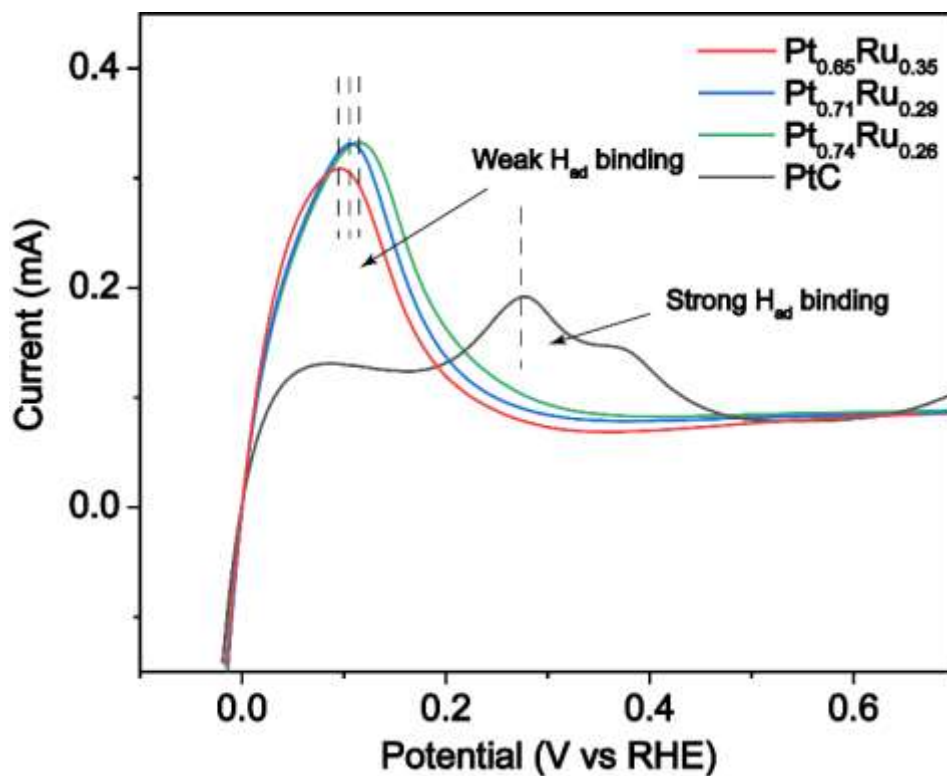

**Figure S2.** The impact of alloy degree on the Pt- $H_{ad}$  interaction determined by electrochemical behavior of as-prepared catalysts in degassed 0.1 M KOH solution.

As displayed in **Figure S2**, the negative shift of oxidation peak of  $H_{ad}$  has been observed and this result indicates that the hydrogen-binding strength can be weakened according to the increased alloy degree.

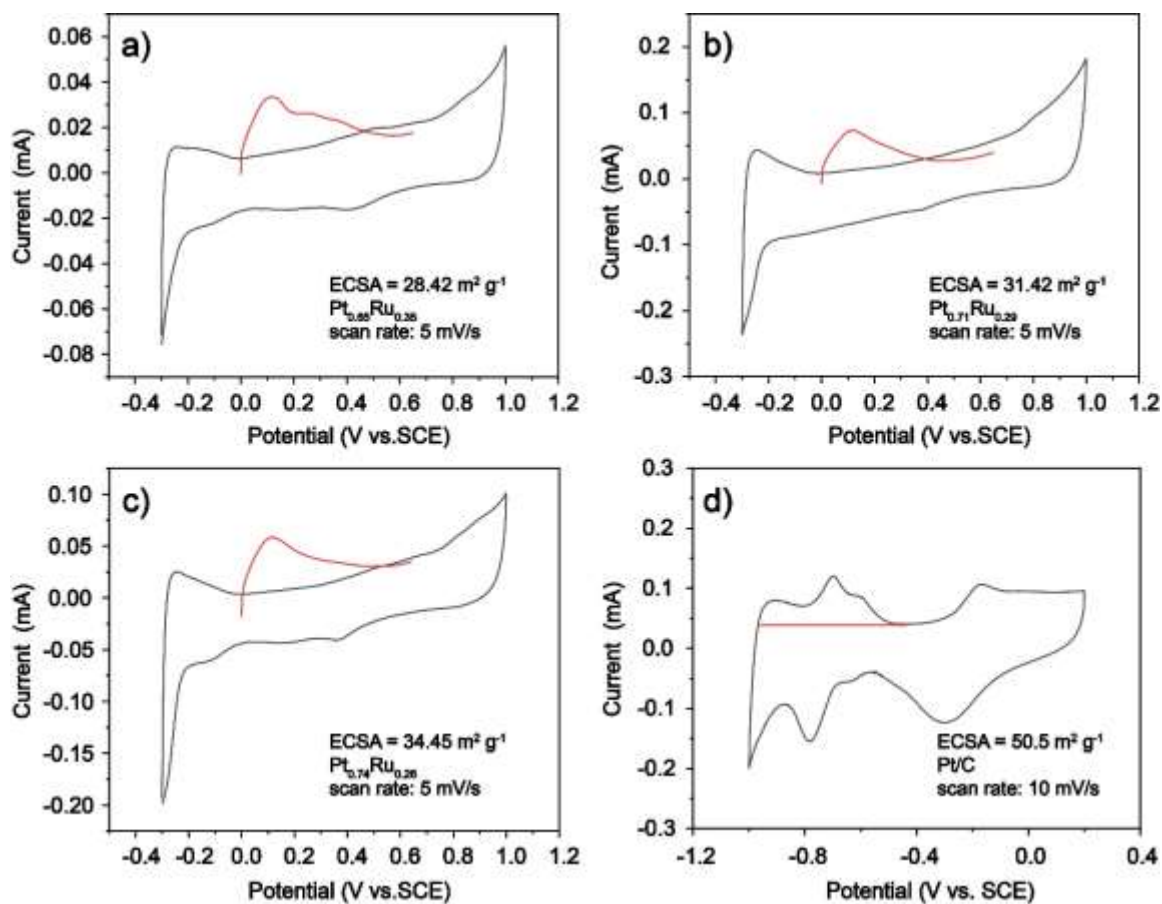

**Figure S3.** Electrochemical surface area measurements. a-c) Cu stripping on PtRu bimetallic nanoparticles for determining the specific surface area of Pt. d) H adsorption on Pt/C for determining the specific surface area of Pt.

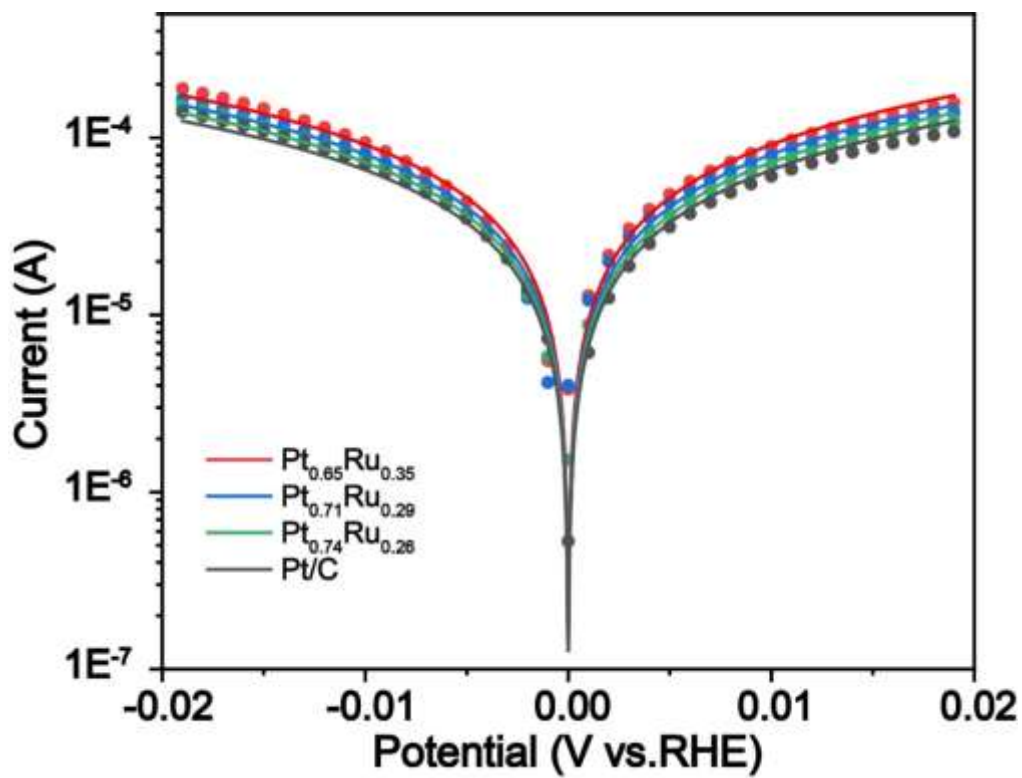

Figure S4. Tafel plots of PtRu bimetallic nanoparticles and Pt/C.

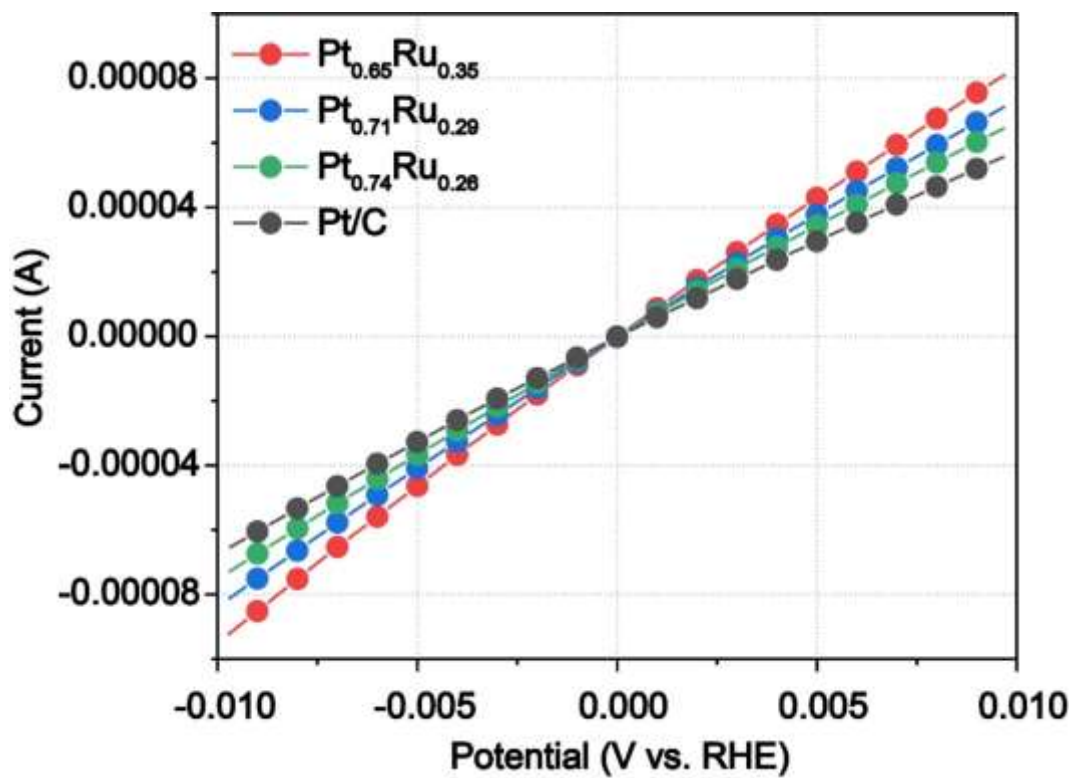

**Figure S5.** Micro-kinetic polarization plots of PtRu bimetallic nanoparticles and Pt/C.

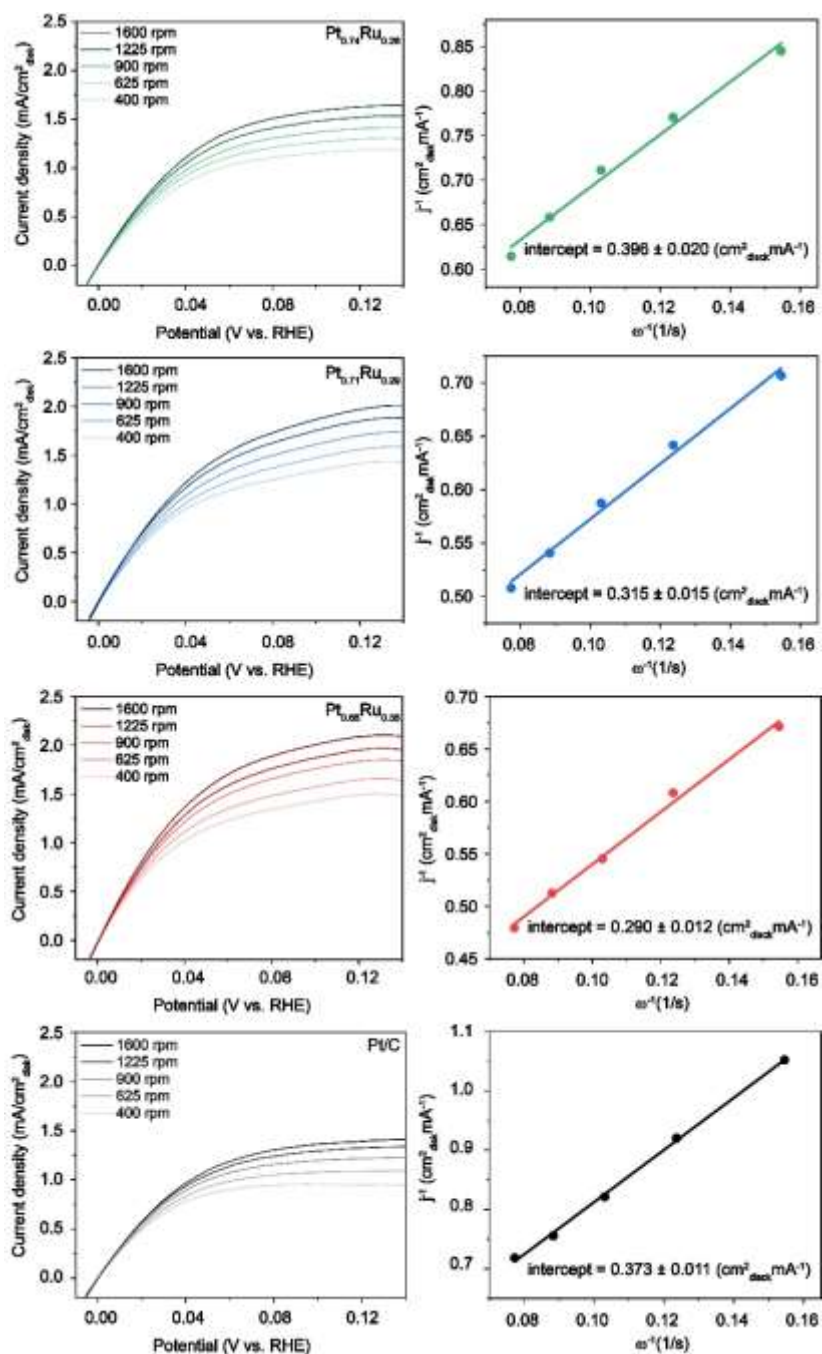

**Figure S6.** Polarization curves of PtRu bimetallic nanoparticles and Pt/C in H<sub>2</sub>-saturated 0.1M KOH at a scan rate of 5mV/s at various rotating speeds. The followed is the corresponding Koutecky–Levich plots at an overpotential of 120mV.



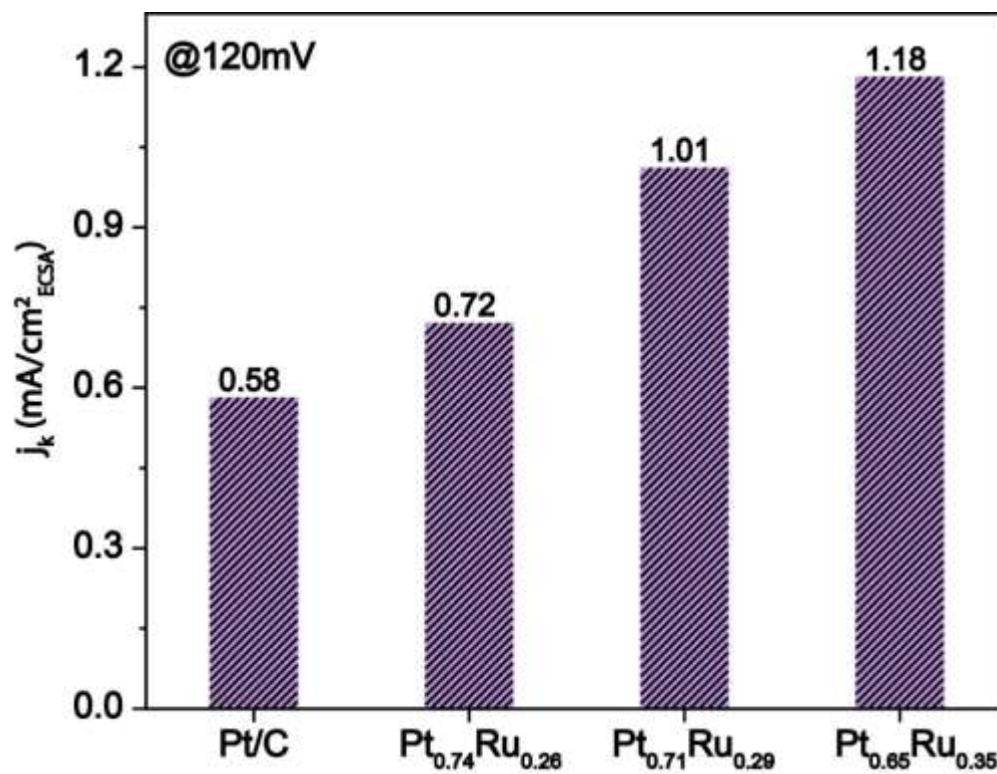

**Figure S7.** ECSA-normalized kinetic current densities derived from Koutecky–Levich plots for PtRu bimetallic nanoparticles and Pt/C at overpotential of 120 mV.

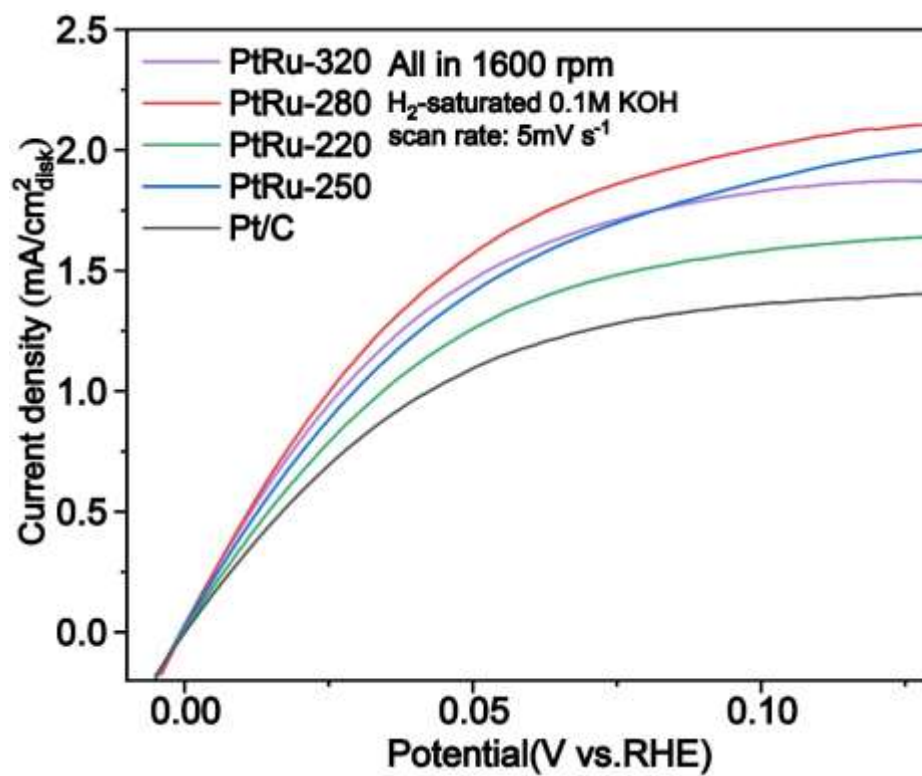

**Figure S8.** HOR activity comparison. PtRu bimetallic nanoparticles prepared under different temperature.

**Table S1.** Summary of ICP-MS results for PtRu bimetallic nanoparticles.

|                   | PtRu-220 | PtRu-250 | PtRu-280 | PtRu-320 |
|-------------------|----------|----------|----------|----------|
| ratio of Pt       | 74%      | 71%      | 65%      | 62%      |
| ratio of Ru       | 26%      | 29%      | 35%      | 38%      |
| Lattice parameter | 3.91     | 3.90     | 3.89     | 3.91     |

**Table S2.** Summary of binding energies for Pt 4f<sub>7/2</sub> and Pt 4f<sub>5/2</sub> of PtRu-280, PtRu-250, PtRu-220 and Pt/C from XPS results.

| Catalyst | Binding energy (eV)  |                                    |                      |                                    |
|----------|----------------------|------------------------------------|----------------------|------------------------------------|
|          | Pt 4f <sub>7/2</sub> | Pt <sup>2+</sup> 4f <sub>7/2</sub> | Pt 4f <sub>5/2</sub> | Pt <sup>2+</sup> 4f <sub>5/2</sub> |
| PtRu-280 | 71.66                | 72.61                              | 75.01                | 75.96                              |
| PtRu-250 | 71.56                | 72.36                              | 74.91                | 75.71                              |
| PtRu-220 | 71.41                | 72.26                              | 74.76                | 75.61                              |
| Pt/C     | 71.31                | 72.51                              | 74.66                | 75.86                              |

**Table S3.** Summary of electrochemical surface areas for PtRu bimetallic nanoparticles and Pt/C.

| Sample   | Electrochemical surface area (m <sup>2</sup> /g) |
|----------|--------------------------------------------------|
| Pt/C     | 50.5                                             |
| PtRu-220 | 34.45                                            |
| PtRu-250 | 31.42                                            |
| PtRu-280 | 28.42                                            |

**Table S4.** Normalized exchange current densities for PtRu bimetallic nanoparticles and Pt/C.

| Sample   | $j_0$ Micropolarization<br>(mA/cm <sup>2</sup> <sub>ECSA</sub> ) | $j_0$ Butler-Volmer fitting<br>(mA/cm <sup>2</sup> <sub>ECSA</sub> ) |
|----------|------------------------------------------------------------------|----------------------------------------------------------------------|
| PtRu-280 | 4.16                                                             | 4.00                                                                 |
| PtRu-250 | 3.41                                                             | 3.28                                                                 |
| PtRu-220 | 2.75                                                             | 2.64                                                                 |
| Pt/C     | 1.89                                                             | 1.76                                                                 |
